# Supplementary material for: Heterogeneity and dynamics of active Kras-induced dysplastic lineages from mouse corpus stomach
Source: PubMed Central journal article supplement (PMC6895174; doi:10.1038/s41467-019-13479-6), 2019-12-05
Supplement: 41467_2019_13479_MOESM5_ESM.pdf [file 41467_2019_13479_MOESM5_ESM.pdf]

## Reporting Summary

Nature Research wishes to improve the reproducibility of the work that we publish. This form provides structure for consistency and transparency in reporting. For further information on Nature Research policies, see [Authors & Referees](#) and the [Editorial Policy Checklist](#).

### Statistics

For all statistical analyses, confirm that the following items are present in the figure legend, table legend, main text, or Methods section.

n/a Confirmed

- The exact sample size ( $n$ ) for each experimental group/condition, given as a discrete number and unit of measurement
- A statement on whether measurements were taken from distinct samples or whether the same sample was measured repeatedly
- The statistical test(s) used AND whether they are one- or two-sided  
*Only common tests should be described solely by name; describe more complex techniques in the Methods section.*
- A description of all covariates tested
- A description of any assumptions or corrections, such as tests of normality and adjustment for multiple comparisons
- A full description of the statistical parameters including central tendency (e.g. means) or other basic estimates (e.g. regression coefficient) AND variation (e.g. standard deviation) or associated estimates of uncertainty (e.g. confidence intervals)
- For null hypothesis testing, the test statistic (e.g.  $F$ ,  $t$ ,  $r$ ) with confidence intervals, effect sizes, degrees of freedom and  $P$  value noted  
*Give  $P$  values as exact values whenever suitable.*
- For Bayesian analysis, information on the choice of priors and Markov chain Monte Carlo settings
- For hierarchical and complex designs, identification of the appropriate level for tests and full reporting of outcomes
- Estimates of effect sizes (e.g. Cohen's  $d$ , Pearson's  $r$ ), indicating how they were calculated

*Our web collection on [statistics for biologists](#) contains articles on many of the points above.*

### Software and code

Policy information about [availability of computer code](#)

Data collection Prism 8, GelCount, CFX Maestro, ZEISS ZEN, JuLI Stage,

Data analysis Prism 8, GelCount, CFX Maestro, DoRothEA package v2, JuLI Stage, ZEISS ZEN, AxioVision SE64 Rel. 4.9.1, RStudio 3.5.2, Seurat 3.0.0, ggplot2 3.1.1, Picante 1.8, Rtsne 0.15, pheatmap 1.0.12, abind 1.4-5, RColorBrewer 1.1-2, Cowplot 0.9.4, Ggthemes 4.2.0, Dplyr 0.8.1, reshape2 1.4.3, Viper 1.16.0, inDrops pipeline, Python 3.7, Numpy 1.15.4, Pandas 0.23.4, Argparse 1.1, Scipy 1.1.0, Matplotlib 3.0.2, Seaborn 0.9.0, Umap 0.3.8

For manuscripts utilizing custom algorithms or software that are central to the research but not yet described in published literature, software must be made available to editors/reviewers. We strongly encourage code deposition in a community repository (e.g. GitHub). See the Nature Research [guidelines for submitting code & software](#) for further information.

### Data

Policy information about [availability of data](#)

All manuscripts must include a [data availability statement](#). This statement should provide the following information, where applicable:

- Accession codes, unique identifiers, or web links for publicly available datasets
- A list of figures that have associated raw data
- A description of any restrictions on data availability

Two scRNA-seq data reported in figure 2, 6 and 7, have been submitted to NCBI Gene Expression Omnibus (GEO): GSE121940 and all the data sets have been released publicly.

## Field-specific reporting

Please select the one below that is the best fit for your research. If you are not sure, read the appropriate sections before making your selection.

- Life sciences     Behavioural & social sciences     Ecological, evolutionary & environmental sciences

For a reference copy of the document with all sections, see [nature.com/documents/nr-reporting-summary-flat.pdf](https://www.nature.com/documents/nr-reporting-summary-flat.pdf)

## Life sciences study design

All studies must disclose on these points even when the disclosure is negative.

|                 |                                                                                                                                                                                                                                                                                                                                                                                                                                                                                                                                                                                                            |
|-----------------|------------------------------------------------------------------------------------------------------------------------------------------------------------------------------------------------------------------------------------------------------------------------------------------------------------------------------------------------------------------------------------------------------------------------------------------------------------------------------------------------------------------------------------------------------------------------------------------------------------|
| Sample size     | We performed at least 3 independent experiments and capture multiple images on multiple tissues or wells. We specified the number of cells and independent experiments in the figure legends and/or methods. Fifteen to twenty wells of Meta4 organoids per condition were used for FACS analysis. A total of 5,000 cells per group were used for clonality analysis using CRA microwell system. About 50 organoids were used for in vitro assays. A total of 50 to 100 organoids were considered from three representative images taken from three wells of each organoid line for quantitative analyses. |
| Data exclusions | We only exclude analyses if there is an obvious reason for poor data, such as dead or sick-looking organoids prior to drug treatment.                                                                                                                                                                                                                                                                                                                                                                                                                                                                      |
| Replication     | All attempts at replication are successful. We established 3 metaplastic and 3 dysplastic organoids lines from independent mouse stomach tissues. We performed at least 3 independent experiments and capture multiple images on multiple tissues or wells.                                                                                                                                                                                                                                                                                                                                                |
| Randomization   | Both male and female mice were randomly used to establish organoid lines.                                                                                                                                                                                                                                                                                                                                                                                                                                                                                                                                  |
| Blinding        | The mouse alleles which were used for this study are C57BL/6 wild-type or Kras-induced mice to establish metaplastic or dysplastic organoid lines. Thus, investigators were not blinded to mouse genotypes during experiments.                                                                                                                                                                                                                                                                                                                                                                             |

## Reporting for specific materials, systems and methods

We require information from authors about some types of materials, experimental systems and methods used in many studies. Here, indicate whether each material, system or method listed is relevant to your study. If you are not sure if a list item applies to your research, read the appropriate section before selecting a response.

### Materials & experimental systems

| n/a                                 | Involved in the study                                           |
|-------------------------------------|-----------------------------------------------------------------|
| <input type="checkbox"/>            | <input checked="" type="checkbox"/> Antibodies                  |
| <input type="checkbox"/>            | <input checked="" type="checkbox"/> Eukaryotic cell lines       |
| <input checked="" type="checkbox"/> | <input type="checkbox"/> Palaeontology                          |
| <input type="checkbox"/>            | <input checked="" type="checkbox"/> Animals and other organisms |
| <input checked="" type="checkbox"/> | <input type="checkbox"/> Human research participants            |
| <input checked="" type="checkbox"/> | <input type="checkbox"/> Clinical data                          |

### Methods

| n/a                                 | Involved in the study                              |
|-------------------------------------|----------------------------------------------------|
| <input checked="" type="checkbox"/> | <input type="checkbox"/> ChIP-seq                  |
| <input type="checkbox"/>            | <input checked="" type="checkbox"/> Flow cytometry |
| <input checked="" type="checkbox"/> | <input type="checkbox"/> MRI-based neuroimaging    |

## Antibodies

### Antibodies used

Anti CD44 Antigen v10-e16 mAb (Clone RM1, CD44v9), Cosmo Bio CAC-LKG-M002, 1:25,000, Rat  
 Lectin from Ulex Europaeus (UEA1-lectin), Sigma L9006, 1:2,000  
 CDX1 Polyclonal Antibody, Thermo Scientific PA5-23056, 1:500, Rabbit  
 Anti-Sox9 Polyclonal Antibody, Millipore Ab5535, 1:1,500, Rabbit  
 Alexa Fluor® 700 anti-human CD44 Antibody (Clone BJ18), Biolegend 338813, 5 µl per million cells in 100 µl staining volume, Mouse  
 Alexa Fluor® 647 anti-mouse CD133 Antibody (Clone 315-2C11), Biolegend 141215, 0.5 mg/ml, Rat  
 PE anti-mouse CD133 Antibody (Clone 315-2C11), Biolegend 141204, 0.2 mg/ml, Rat  
 Mouse ALCAM/CD166 PE-conjugated Antibody (Polyclonal), R&D systems FAB1172P, 10 µL/10<sup>6</sup> cells, Goat  
 Mouse ALCAM/CD166 Fluorescein-conjugated Antibody (Polyclonal), R&D systems FAB1172F, 10 µL/10<sup>6</sup> cells, Goat  
 CD44 Monoclonal Antibody (8E2F3), Invitrogen MA5-15462, 1:1,000, Mouse  
 CD133 (Prominin-1) Monoclonal Antibody (13A4), eBioscience 14-1331-80, 1:100, Rat  
 Recombinant Anti-CD166 antibody [EPR2759(2)], Abcam ab109215, 1:250, Rabbit  
 Purified anti-mouse Ki-67 Antibody (Clone 16A8), Biolegend 652402, 1:200, Rat  
 Villin-1 (R814) Antibody, Cell Signaling Technology 2369, 1:300, Rabbit  
 Monoclonal Anti-Vimentin antibody produced in mouse (Clone V9), Sigma-Aldrich V6630, 1:300, Mouse  
 Pan-cytokeratin (polyclonal), Dako Z0622, 1:4,000, Rabbit  
 Phospho-Ezrin (Thr567)/Radixin (Thr564)/Moesin (Thr558) (48G2), Cell Signaling Technology 3726, 1:300, Rabbit

Anti-Cortactin (p80/85) Antibody, clone 4F11, Millipore 05-180, 1:1,000, Mouse  
 Alexa Fluor™ 647 Phalloidin, Invitrogen A22287, 1:100  
 p44/42 MAPK (Erk1/2) (137F5), Cell Signaling Technology 4695, 1:1,000, Rabbit  
 Phospho-p44/42 MAPK (Erk1/2) (Thr202/Tyr204) (D13.14.4E) XP®, Cell Signaling Technology 4370S, 1:2,000, Rabbit  
 Monoclonal Anti-β-Actin antibody produced in mouse, Sigma A5316, 1:2,500, Mouse  
 RFP Antibody Pre-adsorbed (Polyclonal, tdTOM), Rockland 600-401-379, 1:500, Rabbit  
 Donkey anti-Rat IgG (H+L) Highly Cross-Adsorbed Secondary Antibody, Alexa Fluor 488, Invitrogen A-21208, 1:500  
 Donkey anti-Rat IgG (H+L) Highly Cross-Adsorbed Secondary Antibody, Alexa Fluor 594, Invitrogen A-21209, 1:500  
 Donkey anti-Rat IgG (H+L) Cross-Adsorbed Secondary Antibody, DyLight 680, Invitrogen SA5-10030, 1:500  
 Donkey anti-Mouse IgG (H+L) Highly Cross-Adsorbed Secondary Antibody, Alexa Fluor 488, Invitrogen A-21202, 1:500  
 Donkey anti-Mouse IgG (H+L) Highly Cross-Adsorbed Secondary Antibody, Alexa Fluor 555, Invitrogen A-31570, 1:500  
 Donkey anti-Mouse IgG (H+L) Highly Cross-Adsorbed Secondary Antibody, Alexa Fluor 647, Invitrogen A-31571, 1:500  
 Donkey anti-Rabbit IgG (H+L) Highly Cross-Adsorbed Secondary Antibody, Alexa Fluor 488, Invitrogen A-21206, 1:500  
 Donkey anti-Rabbit IgG (H+L) Highly Cross-Adsorbed Secondary Antibody, Alexa Fluor 546, Invitrogen A10040, 1:500  
 Donkey anti-Rabbit IgG (H+L) Highly Cross-Adsorbed Secondary Antibody, Alexa Fluor 647, Invitrogen A-31573, 1:500  
 IRDye® 800CW Donkey anti-Rabbit IgG Secondary Antibody LI-COR 926-32213 1:15,000  
 IRDye® 680LT Donkey anti-Mouse IgG Secondary Antibody LI-COR 926-68022 1:15,000

## Validation

Anti CD44 Antigen v10-e16 mAb (Clone RM1, CD44v9), Cosmo Bio CAC-LKG-M002, <https://www.cosmobiousa.com/products/anti-cd44-v10-e16-mab-clone-rm1>  
 Lectin from Ulex Europaeus (UEA1-lectin), Sigma L9006, <https://www.sigmaaldrich.com/catalog/product/sigma/l8146?lang=en&region=US>  
 CDX1 Polyclonal Antibody, Thermo Scientific PA5-23056, <https://www.thermofisher.com/antibody/product/CDX1-Antibody-Polyclonal/PA5-23056>  
 Anti-Sox9 Polyclonal Antibody, Millipore Ab5535, [http://www.emdmillipore.com/US/en/product/Anti-Sox9-Antibody,MM\\_NF-AB5535](http://www.emdmillipore.com/US/en/product/Anti-Sox9-Antibody,MM_NF-AB5535)  
 Alexa Fluor® 700 anti-human CD44 Antibody (Clone BJ18), Biolegend 338813, <https://www.biolegend.com/en-us/products/alexa-fluor-700-anti-human-cd44-antibody-14814>  
 Alexa Fluor® 647 anti-mouse CD133 Antibody (Clone 315-2C11), Biolegend 141215, <https://www.biolegend.com/nl-nl/products/alexa-fluor-647-anti-mouse-cd133-antibody-12188>  
 PE anti-mouse CD133 Antibody (Clone 315-2C11), Biolegend 141204, <https://www.biolegend.com/en-us/products/pe-anti-mouse-cd133-antibody-7066>  
 Mouse ALCAM/CD166 PE-conjugated Antibody (Polyclonal), R&D systems FAB1172P, [https://www.rndsystems.com/products/mouse-alcam-cd166-pe-conjugated-antibody\\_fab1172p](https://www.rndsystems.com/products/mouse-alcam-cd166-pe-conjugated-antibody_fab1172p)  
 Mouse ALCAM/CD166 Fluorescein-conjugated Antibody (Polyclonal), R&D systems FAB1172F, [https://www.rndsystems.com/products/mouse-alcam-cd166-fluorescein-conjugated-antibody\\_fab1172f](https://www.rndsystems.com/products/mouse-alcam-cd166-fluorescein-conjugated-antibody_fab1172f)  
 CD44 Monoclonal Antibody (8E2F3), Invitrogen MA5-15462, <https://www.thermofisher.com/antibody/product/CD44-Antibody-clone-8E2F3-Monoclonal/MA5-15462>  
 CD133 (Prominin-1) Monoclonal Antibody (13A4), eBioscience 14-1331-80, <https://www.thermofisher.com/antibody/product/CD133-Prominin-1-Antibody-clone-13A4-Monoclonal/14-1331-82>  
 Recombinant Anti-CD166 antibody [EPR2759(2)], Abcam ab109215, <https://www.abcam.com/cd166-antibody-epr27592-ab109215.html>  
 Purified anti-mouse Ki-67 Antibody (Clone 16A8), Biolegend 652402, <https://www.biolegend.com/en-us/products/purified-anti-mouse-ki-67-antibody-7840>  
 Villin-1 (R814) Antibody, Cell Signaling Technology 2369, <https://www.cellsignal.com/products/primary-antibodies/villin-1-r814-antibody/2369>  
 Monoclonal Anti-Vimentin antibody produced in mouse (Clone V9), Sigma-Aldrich V6630, <https://www.sigmaaldrich.com/catalog/product/sigma/v6630?lang=en&region=US>  
 Pan-cytokeratin (polyclonal), Dako Z0622, <https://www.labome.com/product/Dako/Z0622.html>  
 Phospho-Ezrin (Thr567)/Radixin (Thr564)/Moesin (Thr558) (48G2), Cell Signaling Technology 3726, <https://www.cellsignal.com/products/primary-antibodies/phospho-ezrin-thr567-radixin-thr564-moesin-thr558-48g2-rabbit-mab/3726>  
 Anti-Cortactin (p80/85) Antibody, clone 4F11, Millipore 05-180, [http://www.emdmillipore.com/US/en/product/Anti-Cortactin-p80-85-Antibody-clone-4F11,MM\\_NF-05-180](http://www.emdmillipore.com/US/en/product/Anti-Cortactin-p80-85-Antibody-clone-4F11,MM_NF-05-180)  
 Alexa Fluor™ 647 Phalloidin, Invitrogen A22287, <https://www.thermofisher.com/order/catalog/product/A22287>  
 p44/42 MAPK (Erk1/2) (137F5), Cell Signaling Technology 4695, <https://www.cellsignal.com/products/primary-antibodies/p44-42-mapk-erk1-2-137f5-rabbit-mab/4695>  
 Phospho-p44/42 MAPK (Erk1/2) (Thr202/Tyr204) (D13.14.4E) XP®, Cell Signaling Technology 4370S, <https://www.cellsignal.com/products/primary-antibodies/phospho-p44-42-mapk-erk1-2-thr202-tyr204-d13-14-4e-xp-rabbit-mab/4370>  
 Monoclonal Anti-β-Actin antibody produced in mouse, Sigma A5316, <https://www.sigmaaldrich.com/catalog/product/sigma/a5316?lang=en&region=US>  
 RFP Antibody Pre-adsorbed (Polyclonal, tdTOM), Rockland 600-401-379, [https://rockland-inc.com/store/Antibodies-to-GFP-and-Antibodies-to-RFP-600-401-379-O4L\\_24299.aspx](https://rockland-inc.com/store/Antibodies-to-GFP-and-Antibodies-to-RFP-600-401-379-O4L_24299.aspx)  
 Donkey anti-Rat IgG (H+L) Highly Cross-Adsorbed Secondary Antibody, Alexa Fluor 488, Invitrogen A-21208, <https://www.thermofisher.com/antibody/product/Donkey-anti-Rat-IgG-H-L-Highly-Cross-Adsorbed-Secondary-Antibody-Polyclonal/A-21208>  
 Donkey anti-Rat IgG (H+L) Highly Cross-Adsorbed Secondary Antibody, Alexa Fluor 594, Invitrogen A-21209, <https://www.thermofisher.com/antibody/product/Donkey-anti-Rat-IgG-H-L-Highly-Cross-Adsorbed-Secondary-Antibody-Polyclonal/A-21209>

Donkey anti-Rat IgG (H+L) Cross-Adsorbed Secondary Antibody, DyLight 680, Invitrogen SA5-10030, <https://www.thermofisher.com/antibody/product/Donkey-anti-Rat-IgG-H-L-Cross-Adsorbed-Secondary-Antibody-Polyclonal/SA5-10030>

Donkey anti-Mouse IgG (H+L) Highly Cross-Adsorbed Secondary Antibody, Alexa Fluor 488, Invitrogen A-21202, <https://www.thermofisher.com/antibody/product/Donkey-anti-Mouse-IgG-H-L-Highly-Cross-Adsorbed-Secondary-Antibody-Polyclonal/A-21202>

Donkey anti-Mouse IgG (H+L) Highly Cross-Adsorbed Secondary Antibody, Alexa Fluor 555, Invitrogen A-31570, <https://www.thermofisher.com/antibody/product/Donkey-anti-Mouse-IgG-H-L-Highly-Cross-Adsorbed-Secondary-Antibody-Polyclonal/A-31570>

Donkey anti-Mouse IgG (H+L) Highly Cross-Adsorbed Secondary Antibody, Alexa Fluor 647, Invitrogen A-31571, <https://www.thermofisher.com/antibody/product/Donkey-anti-Mouse-IgG-H-L-Highly-Cross-Adsorbed-Secondary-Antibody-Polyclonal/A-31571>

Donkey anti-Rabbit IgG (H+L) Highly Cross-Adsorbed Secondary Antibody, Alexa Fluor 488, Invitrogen A-21206, <https://www.thermofisher.com/antibody/product/Donkey-anti-Rabbit-IgG-H-L-Highly-Cross-Adsorbed-Secondary-Antibody-Polyclonal/A-21206>

Donkey anti-Rabbit IgG (H+L) Highly Cross-Adsorbed Secondary Antibody, Alexa Fluor 546, Invitrogen A10040, <https://www.thermofisher.com/antibody/product/Donkey-anti-Rabbit-IgG-H-L-Highly-Cross-Adsorbed-Secondary-Antibody-Polyclonal/A10040>

Donkey anti-Rabbit IgG (H+L) Highly Cross-Adsorbed Secondary Antibody, Alexa Fluor 647, Invitrogen A-31573, <https://www.thermofisher.com/antibody/product/Donkey-anti-Rabbit-IgG-H-L-Highly-Cross-Adsorbed-Secondary-Antibody-Polyclonal/A-31573>

IRDye® 800CW Donkey anti-Rabbit IgG Secondary Antibody, LI-COR 926-32213, <https://www.licor.com/bio/reagents/irdye-800cw-donkey-anti-rabbit-igg-secondary-antibody>

IRDye® 680LT Donkey anti-Mouse IgG Secondary Antibody, LI-COR 926-68022, <https://www.licor.com/bio/reagents/irdye-680lt-donkey-anti-mouse-igg-secondary-antibody>

## Eukaryotic cell lines

Policy information about [cell lines](#)

|                                                                      |                                                                                                                                |
|----------------------------------------------------------------------|--------------------------------------------------------------------------------------------------------------------------------|
| Cell line source(s)                                                  | Novel organoid lines established from mouse stomach tissues                                                                    |
| Authentication                                                       | None of the cell lines were authenticated.                                                                                     |
| Mycoplasma contamination                                             | All organoid lines were tested negative for mycoplasma contamination and culture media contain Mycoplasma elimination reagent. |
| Commonly misidentified lines<br>(See <a href="#">ICLAC</a> register) | None                                                                                                                           |

## Animals and other organisms

Policy information about [studies involving animals](#); [ARRIVE guidelines](#) recommended for reporting animal research

|                         |                                                                                                                                     |
|-------------------------|-------------------------------------------------------------------------------------------------------------------------------------|
| Laboratory animals      | 6-8 weeks old C57BL/6 mice. Both male and female mice were used.                                                                    |
| Wild animals            | This study did not involve wild animals.                                                                                            |
| Field-collected samples | This study did not involve samples collected from the field.                                                                        |
| Ethics oversight        | All mouse imaging and surgical protocols were approved by the Institutional Animal Care and Use Committee of Vanderbilt University. |

Note that full information on the approval of the study protocol must also be provided in the manuscript.

## Flow Cytometry

### Plots

Confirm that:

- The axis labels state the marker and fluorochrome used (e.g. CD4-FITC).
- The axis scales are clearly visible. Include numbers along axes only for bottom left plot of group (a 'group' is an analysis of identical markers).
- All plots are contour plots with outliers or pseudocolor plots.
- A numerical value for number of cells or percentage (with statistics) is provided.

### Methodology

|                    |                                                                                                      |
|--------------------|------------------------------------------------------------------------------------------------------|
| Sample preparation | Meta4 cells were isolated from the Meta4 organoids as described in the Supplemental Methods section. |
|--------------------|------------------------------------------------------------------------------------------------------|

|                           |                                                                                                                                                                                                                                                                                                                                                                                                                                                                          |
|---------------------------|--------------------------------------------------------------------------------------------------------------------------------------------------------------------------------------------------------------------------------------------------------------------------------------------------------------------------------------------------------------------------------------------------------------------------------------------------------------------------|
| Instrument                | FACSAria III & LSR II flow cytometer (BD Biosciences), and Sony SH800                                                                                                                                                                                                                                                                                                                                                                                                    |
| Software                  | BD FACSDiva software or SH800S Cell Sorter was used for data collection and FlowJo v10 for data analysis.                                                                                                                                                                                                                                                                                                                                                                |
| Cell population abundance | Live cells were typically over 85% of single cells, and CD133+/CD166+ dual positive cells were typically more than 90% of live cells. CD133-/CD166- dual negative cells were typically less than 10%. CD44 was used to determine CD44- and CD44+ cells among the dual positive or negative cells. 80~95% of live cells were CD44-/CD133+/CD166+ cells, 1~3% of live cells were CD44+/CD133+/CD166+ cells, and less than 2% of live cells were CD44-/CD133-/CD166- cells. |
| Gating strategy           | Using the FSC/SSC gating, debris was removed by gating on the main cell population. Positivity threshold for each sample was defined on the basis of unstained cells. Identical positivity threshold was applied to all samples and representative plots and gating are provided with every flow cytometry figure.                                                                                                                                                       |

Tick this box to confirm that a figure exemplifying the gating strategy is provided in the Supplementary Information.
