# Supplementary material for: Heterogeneity and dynamics of active Kras-induced dysplastic lineages from mouse corpus stomach
Source: PubMed Central journal article supplement (PMC6895174; doi:10.1038/s41467-019-13479-6), 2019-12-05
Supplement: 41467_2019_13479_MOESM6_ESM.pdf [file 41467_2019_13479_MOESM6_ESM.pdf]

**Title:** Supplementary Movie 1

**Description:** Live imaging movies of organoid growth in 3D cultures

**Title:** Supplementary Movie 2

**Description:** Live imaging movies of organoid growth in 3D cultures

**Title:** Supplementary Data1

**Description:** A list of genes used for gene ontology analysis.
